# Supplementary material for: Imputation of plasma lipid species to facilitate integration of lipidomic datasets
Source: PubMed Central journal article supplement (PMC10879118; doi:10.1038/s41467-024-45838-3), 2024-02-20
Supplement: 41467_2024_45838_MOESM3_ESM.pdf [file 41467_2024_45838_MOESM3_ESM.pdf]

### **Description of Additional Supplementary Files**

**Supplementary Data 1.** LIPID to AusDiab lipid species mapping

**Supplementary Data 2.** AusDiab to LIPID lipid species mapping.

**Supplementary Data 3.** MRM transitions and conditions for examined lipid species.

**Supplementary Data 4.** Conditions for tandem mass spectrometry analysis of the LIPID study.
